# Supplementary material for: High toughness fully physical cross-linked double network organohydrogels for strain sensors with anti-freezing and anti-fatigue properties
Source: Royal Society of Chemistry journal article supplement (doi:10.1039/d1ma00618e), 2021-01-01
Supplement: d1ma00618e1.pdf [file d1ma00618e1.pdf]

**Electronic Supplementary Information**

**High Toughness Fully Physical Cross-Linked Double Network Organohydrogels  
for Strain Sensor with Anti-Freezing and Anti-Fatigue Property**

Li Tang<sup>a,ξ</sup>, Shaoji Wu<sup>a,ξ</sup>, Yue Xu<sup>a</sup>, Ting Cui<sup>a</sup>, Yuhua Li<sup>b</sup>, Wu Wang<sup>a</sup>, Liang Gong<sup>a\*</sup> and  
Jianxin Tang<sup>a\*</sup>

<sup>a</sup> Hunan Key Laboratory of Biomedical Nanomaterials and Devices  
College of Life Sciences and Chemistry  
Hunan University of Technology, Zhuzhou 412007, China

<sup>b</sup> College of Packaging and Materials Engineering  
Hunan University of Technology, Zhuzhou 412007, China

<sup>ξ</sup> The authors contribute equally to this work.

\* Correspondence: gl569940808@126.com (L.G.); jxtang0733@163.com (J.T.)

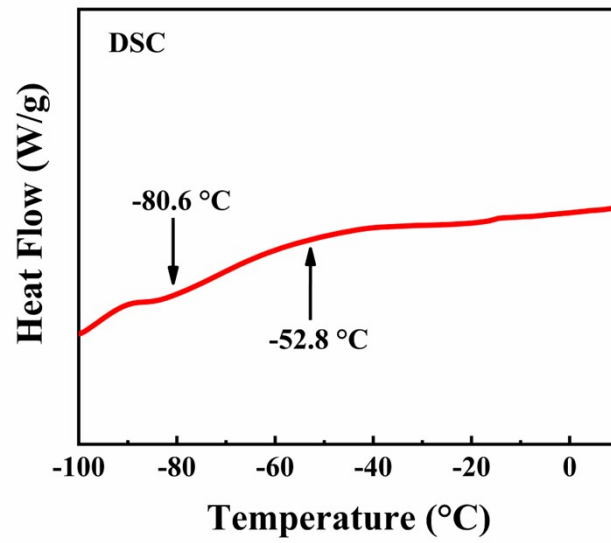

**Fig. S1** DSC curve of the gelatin/pHEAA/Gly/LiCl organohydrogels from -100 °C to 10 °C.

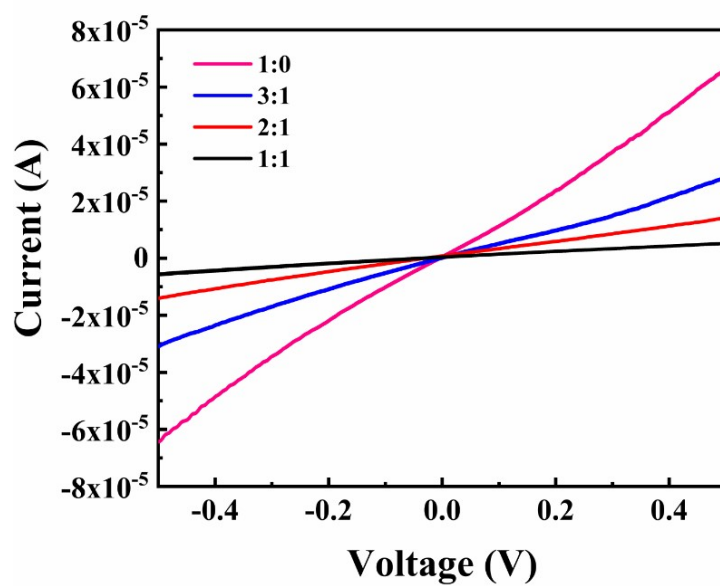

**Fig. S2** The current-voltage curves of gelatin/pHEAA/Gly/LiCl organohydrogels with different water/glycerol ratios.

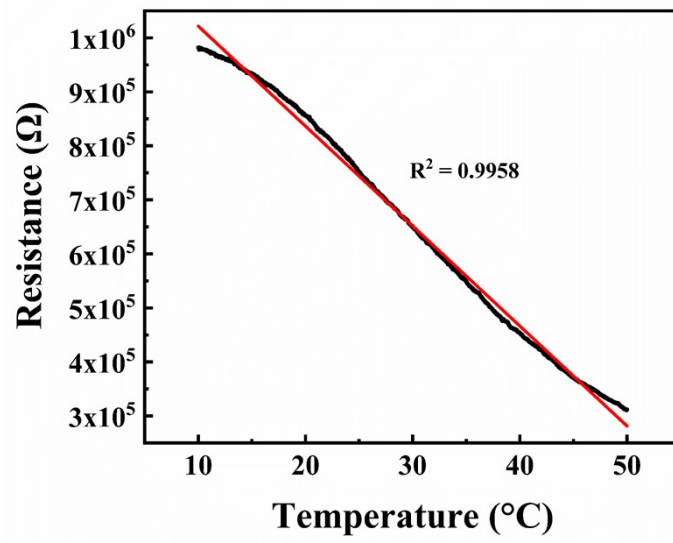

**Fig. S3** The changes of resistance of gelatin/pHEAA/Gly/LiCl organohydrogels when the temperature increases from 10 °C to 50 °C.

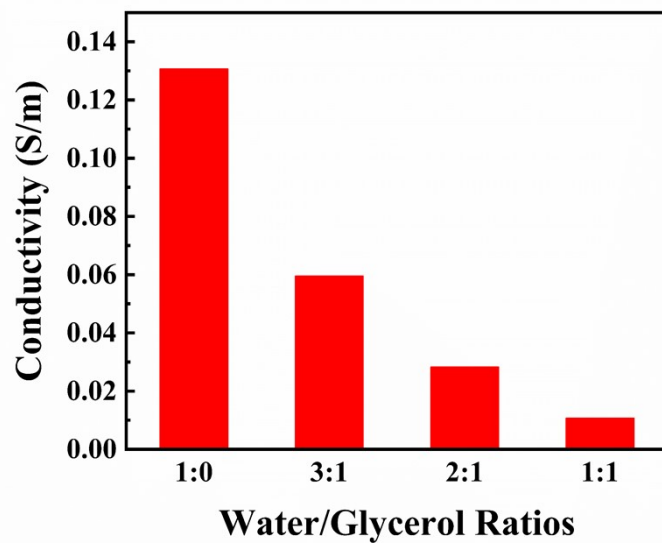

**Fig. S4** The conductivity of gelatin/pHEAA/Gly/LiCl organohydrogels with different water/glycerin ratio.
